# Supplementary material for: Up-conversion luminescence and near-infrared quantum cutting in Y6O5F8:RE3+ (RE = Yb, Er, and Ho) with controllable morphologies by hydrothermal synthesis
Source: Royal Society of Chemistry journal article supplement (doi:10.1039/c2dt32463f), 2012-11-28
Supplement: c2dt32463f.pdf [file c2dt32463f.pdf]

† **Electronic Supplementary Information**

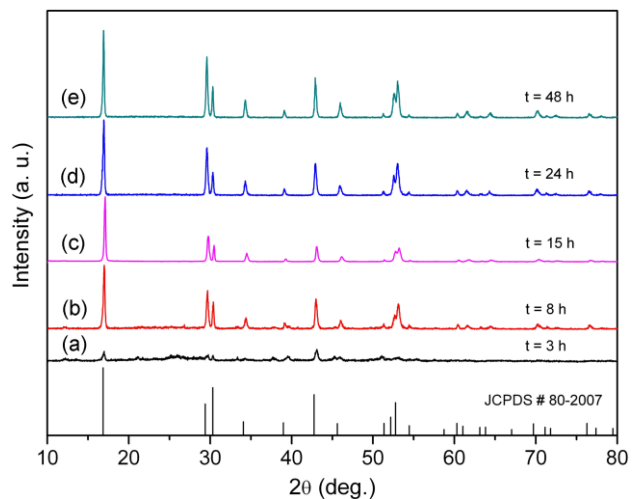

Figure S1 XRD patterns of  $Y(OH)_{1.63}F_{1.37}$  prepared by using CTAB as additive.

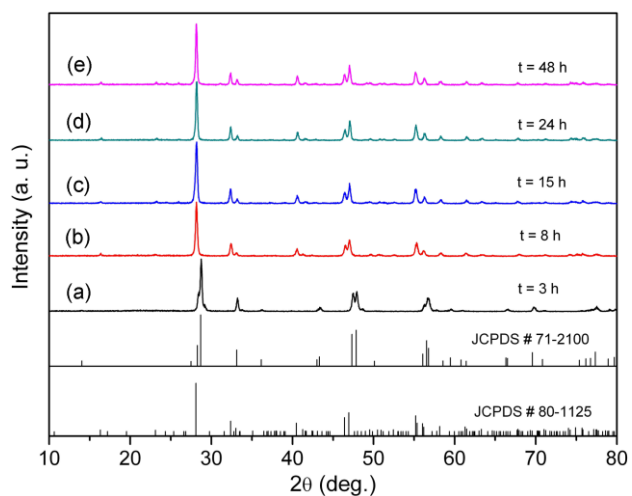

Figure S2 XRD patterns of  $Y_6O_5F_8$  prepared by using CTAB as additive.

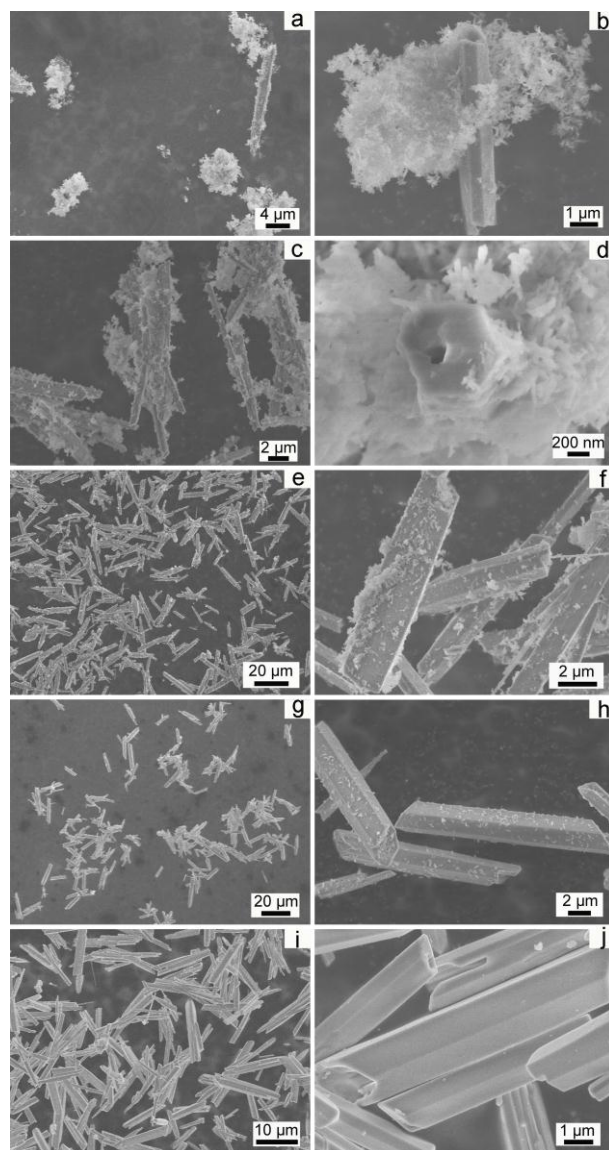

Figure S3 SEM images of evolution for  $Y(OH)_{1.63}F_{1.37}$  at different hydrothermal times: (a, b) 3 h, (c, d) 8 h, (e, f) 15 h, (g, h) 24 h, and (i, j) 48 h.

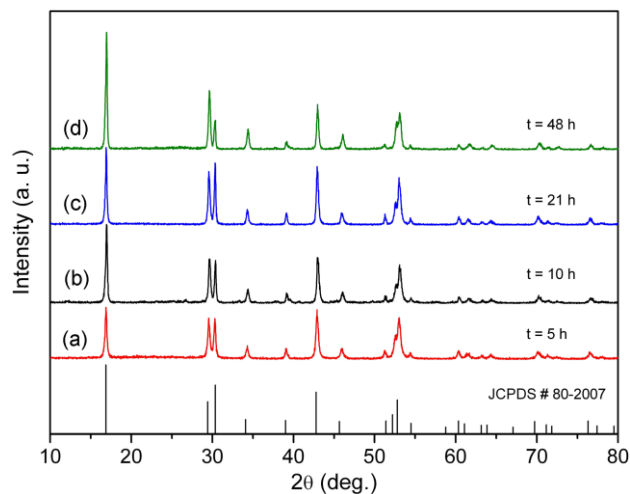

Figure S4 XRD patterns of  $Y(OH)_{1.63}F_{1.37}$  prepared by using PVP as additive.

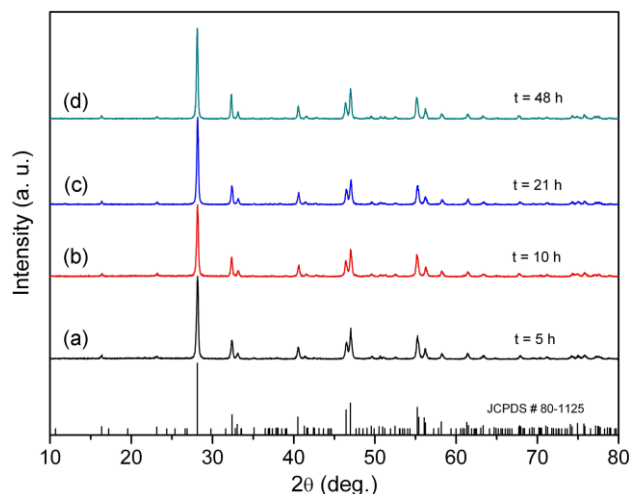

Figure S5 XRD patterns of  $Y_6O_5F_8$  prepared by using PVP as additive.

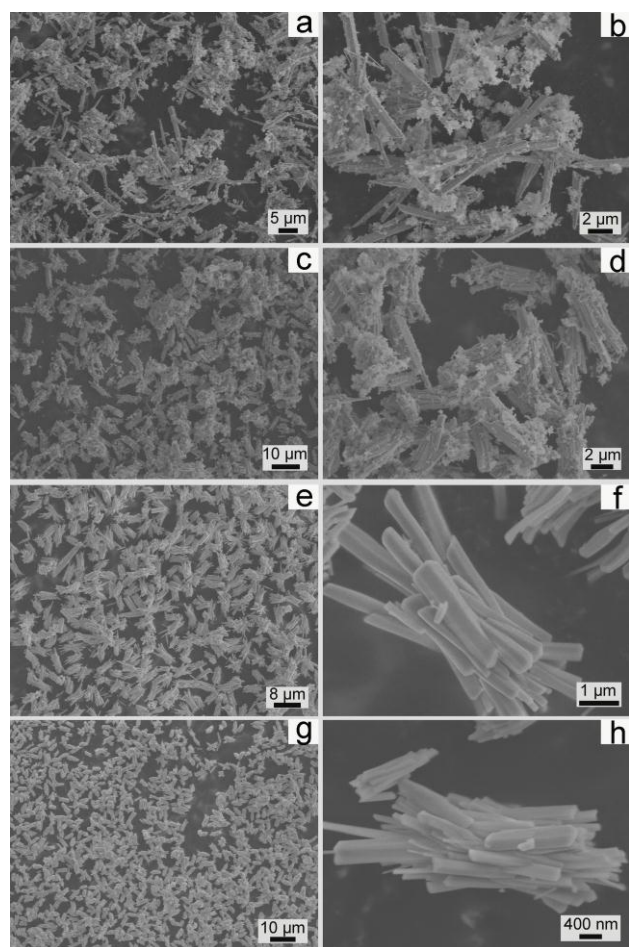

Figure S6 SEM images of evolution for  $Y(OH)_{1.63}F_{1.37}$  at different hydrothermal times (using PVP as additive): (a, b) 5 h, (c, d) 10 h, (e, f) 21 h, and (g, h) 48 h.

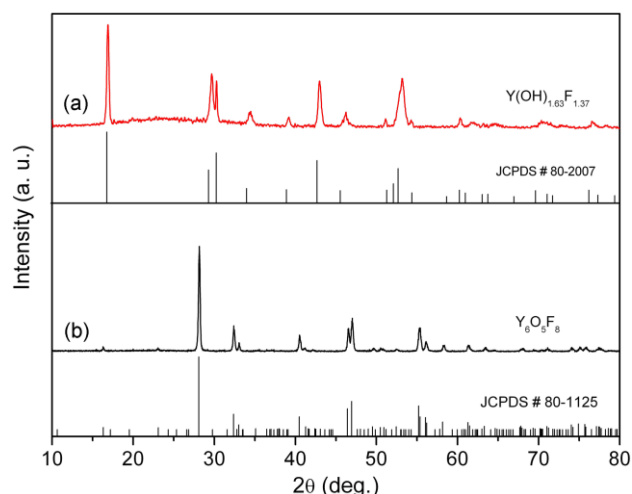

Figure S7 XRD patterns of both  $Y(OH)_{1.63}F_{1.37}$  and  $Y_6O_5F_8$  prepared by using EDTA as additive.

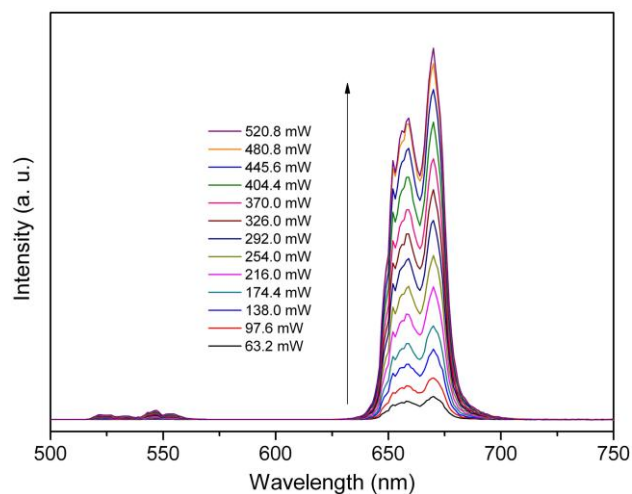

Figure S8 UC emission spectra of  $Y_{5.34}O_5F_8:0.6Yb^{3+}, 0.06Er^{3+}$  using PVP as additive under DL excitation of 980 nm.

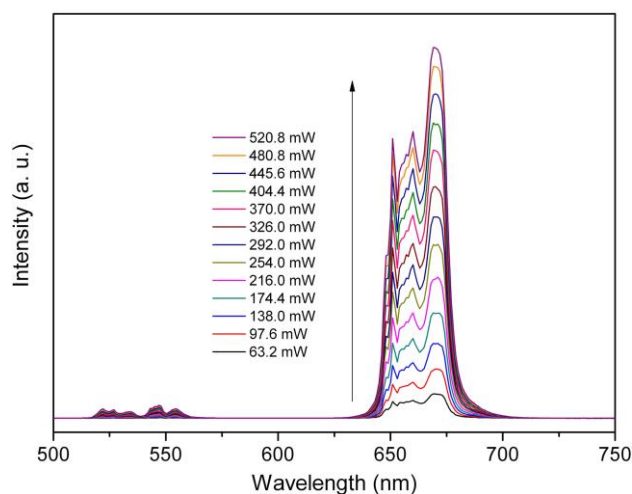

Figure S9 UC emission spectra of  $Y_{5.34}O_5F_8:0.6Yb^{3+}, 0.06Er^{3+}$  using EDTA as additive under DL excitation of 980 nm.

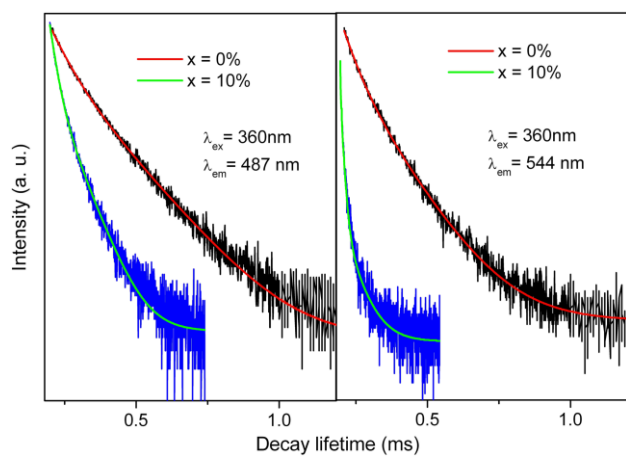

Figure S10 Decay curves of both YOF: 1%Ho<sup>3+</sup> and YOF:10%Yb<sup>3+</sup>, 1%Ho<sup>3+</sup>.
